# Supplementary material
Source: publisher figshare collection journal article supplement (https://tandf.figshare.com/ndownloader/files/13086110)
Supplement: Supplementary file 1 [file 13086110]

	precision	recall	F1
digital	0.276595744680851	0.896551724137931	0.422764227642276
movements	0.482142857142857	0.509433962264151	0.495412844036697
crime	0.444444444444444	0.48780487804878	0.465116279069767
sports	0.857142857142857	0.947368421052632	0.9
culture/arts	0.439655172413793	0.879310344827586	0.586206896551724
foreign politics	0.716981132075472	0.452380952380952	0.554744525547445
conflict	0.333333333333333	0.333333333333333	0.333333333333333
politics	0.73469387755102	0.6	0.660550458715596
economy	0.631578947368421	0.738461538461539	0.680851063829787
media/tech	0.710144927536232	0.471153846153846	0.566473988439306
science/health	0.176470588235294	0.473684210526316	0.257142857142857
incidents	0.217391304347826	0.75	0.337078651685393
